# Supplementary material for: 2D Co-based coordination polymer with a histidine derivative as an efficient heterogeneous catalyst for the oxidation of cyclohexene
Source: Royal Society of Chemistry journal article supplement (doi:10.1039/c7ce00349h), 2017-01-01
Supplement: c7ce00349h1.pdf [file c7ce00349h1.pdf]

## 2D Co-based coordination polymer with histidine derivative as an efficient heterogeneous catalyst for the oxidation of cyclohexene

Fan Yu,<sup>a,\*</sup> Xin Xiong,<sup>a</sup> Kexing Huang,<sup>a</sup> Yinliu Zhou<sup>a</sup> and Bao Li<sup>b,\*</sup>

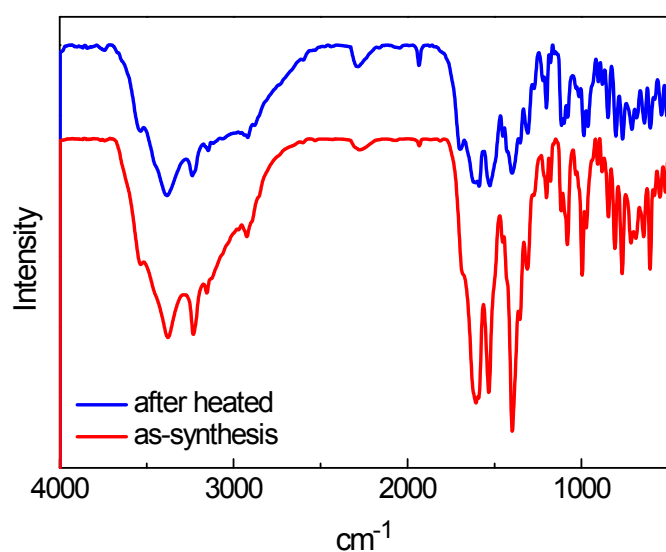

Figure S1 the IR spectra of 1 and activated 1.

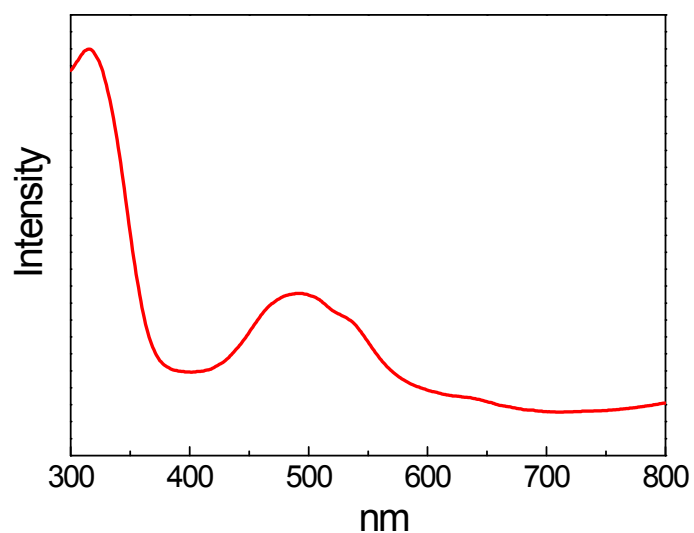

Figure S2. Uv-vis spectra of 1.

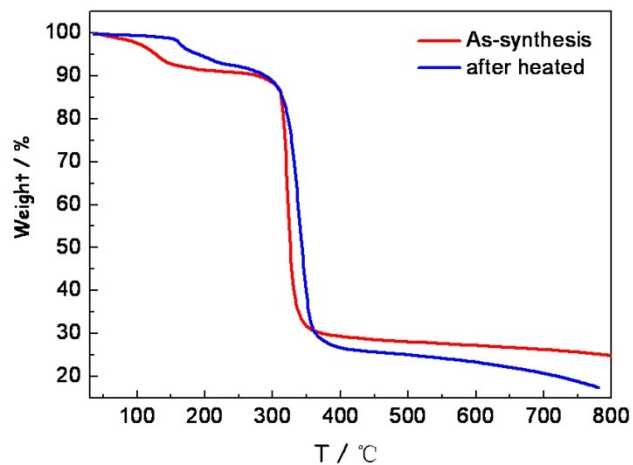

Figure S3. TGA curves of 1 and after heated.

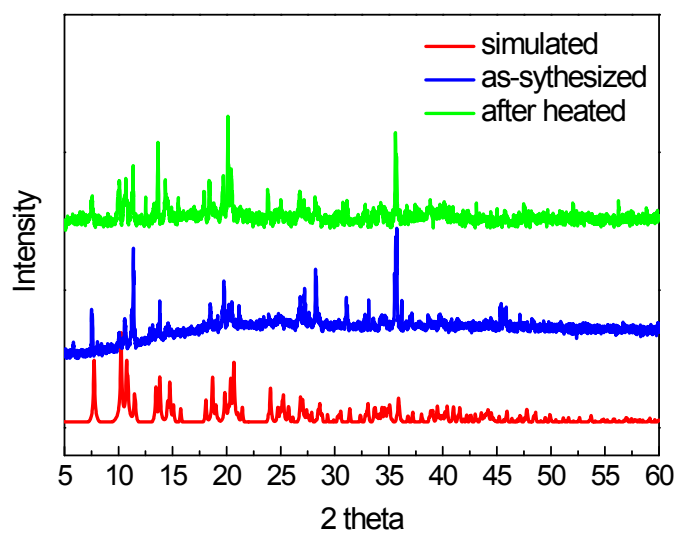

Figure S4. XRD spectra of 1, 1 after heated

Table S1 the comparison of 1 with other Co-based catalyst

| Catalyst                 | Conversion(%) | Main Product | Selectivity(%) | Activation Energy(kJ mol <sup>-1</sup> ) |
|--------------------------|---------------|--------------|----------------|------------------------------------------|
| 1 at 60 °C               | 82.56         | P1           | 71.93          | 91.98                                    |
| 2a at 60 °C <sup>a</sup> | 60.4          | P2           | 73.6           | 67.3                                     |
| 2 at 60 °C <sup>a</sup>  | 8.2           | P2           | 66.5           | 129.6                                    |
| 3 at 70 °C <sup>b</sup>  | 27.5          | P1           | 66             |                                          |

*tert*-butyl-2-cyclohexenyl-1-peroxide ( named as *P1*), followed by the by-product, 2-cyclohexen-1-one ( named as *P2*) and cyclohexene oxide ( named as *P3*)

(a)H. Ren, R. Yao and X. Zhang, *INORG CHEM*, 2015, **54**, 6312-6318

(b)M. Tonigold, Y. Lu, B. Bredenkoetter, B. Rieger, S. Bahnmüller, J. Hitzbleck, G. Langstein and D. Volkmer, *ANGEW CHEM INT EDIT*, 2009, **48**, 7546-7550.
